# Supplementary material for: Enterotype Bacteroides Is Associated with a High Risk in Patients with Diabetes: A Pilot Study
Source: J Diabetes Res. 2020 Jan 22;2020:6047145. doi: 10.1155/2020/6047145 (PMC6996672; doi:10.1155/2020/6047145)
Supplement: Supplementary 1 — Table S1. Number of clean reads and average length of reads in each subject. [file 6047145.f1.xls]

## Sheet: Sheet1
Table S1. Number of clean reads and average length of reads in each subject
Sample name	Clean Reads	Bases(bp)	Q20(%)	Q30(%)	GC(%)	Average length(bp)
J30219	63093	26303957	0.9426	0.904	0.5255	416
J30507	58060	24536945	0.9383	0.8985	0.5137	422
J30510	56296	23547741	0.9456	0.9093	0.5134	418
J30514	55513	23294860	0.9425	0.9049	0.5195	419
J30515	58381	23963379	0.949	0.9148	0.5151	410
J30523	63725	26455633	0.9499	0.916	0.505	415
J30525	59344	24736425	0.9433	0.9056	0.5114	416
J30526	61144	25812909	0.9405	0.9021	0.5148	422
J30529	55719	22763167	0.9512	0.9175	0.518	408
J30534	58344	24320897	0.9495	0.9145	0.5181	416
J30535	57465	23779879	0.9478	0.913	0.5197	413
J30541	55903	23223061	0.9457	0.9088	0.5255	415
J30547	62611	25917901	0.9447	0.9077	0.505	413
J30551	58365	24261692	0.946	0.9115	0.5014	415
J30552	62863	25944242	0.9483	0.9124	0.5251	412
J30561	63234	26407529	0.9415	0.9039	0.5077	417
J30562	60871	25249234	0.9484	0.9126	0.5173	414
J30565	49719	20866434	0.9423	0.9041	0.5175	419
J30566	55559	22956784	0.9451	0.9089	0.5047	413
J30572	60401	25216063	0.9453	0.9097	0.5038	417
J30573	56246	23362872	0.9419	0.9035	0.5152	415
J30576	61114	25418031	0.9457	0.9095	0.5172	415
J30578	58991	24167260	0.9506	0.9164	0.5189	409
J30584	61503	25404302	0.9454	0.9085	0.5182	413
J30585	55633	23128058	0.9425	0.9058	0.4991	415
J30589	55017	23055050	0.9407	0.902	0.5079	419
J30592	57983	24515692	0.9381	0.8987	0.5158	422
J30595	61143	25516105	0.9407	0.9011	0.5252	417
J30596	63012	26124445	0.9468	0.9107	0.5228	414
J30619	59722	24705585	0.9443	0.9066	0.5108	413
J30620	57340	24197515	0.9438	0.9067	0.5087	422
J30626	63900	26715470	0.9452	0.909	0.521	418
J30632	60108	24970945	0.9471	0.9134	0.4948	415
J30649	64329	26832424	0.94	0.9007	0.5116	417
J30650	61247	25559322	0.9428	0.9043	0.5187	417
J30683	43380	17969248	0.9436	0.9064	0.5083	414
J30699	55862	23123282	0.9478	0.9127	0.5067	413
QL30000	57942	24212519	0.9472	0.9128	0.4965	417
QL30006	55294	23079638	0.9483	0.9143	0.5073	417
QL30007	62272	26129934	0.9439	0.9084	0.4855	419
QL30009	51335	21053592	0.9538	0.9209	0.5254	410
QL30018	62590	26467179	0.95	0.9158	0.5509	422
QL30019	62050	26269581	0.9461	0.9101	0.5499	423
QL30024	54525	22707614	0.9461	0.9117	0.4992	416
QL30042	53545	22243214	0.9488	0.9158	0.4987	415
QL30051	63951	26333006	0.955	0.9193	0.585	411
QL30054	55267	22828452	0.9546	0.923	0.5045	413
QL30056	52903	22363220	0.9448	0.9083	0.5371	422
QL30058	55341	23111165	0.9467	0.9111	0.5395	417
QL30060	55797	22806077	0.9521	0.919	0.5177	408
QL30068	60255	25531013	0.9457	0.9085	0.5295	423
QL30069	48609	20362760	0.9494	0.9166	0.4948	418
QL30078	58039	24296664	0.94	0.902	0.5125	418
QL30080	64386	26952079	0.9459	0.9109	0.497	418
QL30081	63270	26385373	0.9514	0.9163	0.542	417
QL30091	54874	22665697	0.9523	0.9186	0.5373	413
QL30092	55955	23423385	0.9533	0.9209	0.5168	418
QL30093	44140	17924097	0.9423	0.9011	0.5336	406
QL30096	58458	24342035	0.952	0.9182	0.5268	416
QL30104	62350	25977487	0.9512	0.9184	0.5115	416
QL30112	62317	26111304	0.9502	0.917	0.5086	419
QL30113	54838	22719475	0.955	0.9232	0.5257	414
QL30115	56169	23563807	0.9448	0.9082	0.5306	419
QL30127	63111	26139183	0.9523	0.9193	0.5152	414
QL30132	55609	22828686	0.955	0.9221	0.5246	410
QL30141	59594	24869992	0.9492	0.9127	0.557	417
QL30142	60238	25091480	0.9475	0.9131	0.4885	416
QL30149	54553	22527869	0.9531	0.9206	0.5207	412
QL30151	63398	26203452	0.9505	0.9155	0.5581	413
QL30152	58091	24032079	0.951	0.9177	0.5183	413
QL30153	59247	24299225	0.9532	0.9203	0.5286	410
QL30159	57662	24209115	0.9538	0.9228	0.5081	419
QL30161	58483	24271710	0.9497	0.9157	0.5106	415
QL30167	41062	16840038	0.9606	0.9314	0.5382	410
QL30169	51376	21589384	0.9519	0.9185	0.5144	420
QL30171	56513	24032779	0.9455	0.9082	0.5497	425
QL30174	62203	26172668	0.941	0.9041	0.5023	420
QL30180	48982	20476260	0.9457	0.9095	0.5256	418
QL30181	48434	19999554	0.9491	0.9148	0.5151	412
QL30185	57991	24293026	0.949	0.9153	0.498	418
QL30187	55580	22825330	0.9533	0.9186	0.5307	410
QL30189	50560	20792533	0.9542	0.921	0.5443	411
QL30190	40770	17353340	0.9437	0.9076	0.536	425
QL30191	34536	14641674	0.9505	0.9151	0.5457	423
QL30194	59501	24953352	0.9454	0.9112	0.4916	419
QL30196	63022	26456882	0.9474	0.9139	0.4849	419
QL30202	33038	13851372	0.9489	0.9148	0.5003	419
QL30203	57013	23866972	0.9454	0.9105	0.5082	418
QL30206	40198	16481881	0.9584	0.9282	0.5184	410
QL30214	59710	25221967	0.9457	0.9091	0.5197	422
QL30215	31557	13418883	0.9426	0.9053	0.5371	425
QL30218	30154	12564733	0.9537	0.9223	0.514	416
QL30220	36173	15101306	0.9532	0.9223	0.5083	417
QL30221	63392	26514407	0.9488	0.9162	0.4953	418
QL30225	47259	19539837	0.9528	0.9217	0.502	413
QL30226	56366	23524932	0.9504	0.9171	0.5106	417
QL30230	60577	24985242	0.9521	0.9185	0.5216	412
QL30233	57779	23987686	0.9525	0.9196	0.5166	415
QL30242	61156	25429608	0.9549	0.9225	0.5191	415
QL30243	42317	17640566	0.9527	0.9212	0.493	416
QL30244	62301	25705051	0.9551	0.9223	0.5516	412
QL30250	61529	25553068	0.9538	0.9214	0.5186	415
QL30253	44794	19021652	0.948	0.9142	0.5106	424
QL30255	55325	23276523	0.9476	0.912	0.5205	420
QL30257	56364	23374963	0.9516	0.9186	0.4874	414
QL30260	48812	20232788	0.9532	0.922	0.5071	414
QL30261	50211	20641513	0.9559	0.924	0.5245	411
QL30263	57311	23892073	0.9475	0.9126	0.5196	416
QL30264	44756	18833346	0.9435	0.9068	0.5412	420
QL30265	32452	13352552	0.9565	0.9262	0.5258	411
QL30267	47286	19910740	0.9506	0.9179	0.5232	421
QL30268	46017	19214832	0.9524	0.9203	0.5158	417
QL30270	37394	15615915	0.9512	0.9183	0.5281	417
QL30271	57190	23758287	0.951	0.917	0.5427	415
QL30285	53084	21864371	0.9554	0.9239	0.5213	411
QL30288	51518	21763592	0.9462	0.9116	0.5175	422
QL30296	57707	24106154	0.9537	0.9229	0.4963	417
QL30302	63692	26796102	0.9474	0.9115	0.5377	420
QL30303	58874	24387655	0.9505	0.9166	0.511	414
QL30315	59387	24451120	0.9571	0.9262	0.5329	411
QL30317	58369	24202630	0.9535	0.9214	0.5122	414
QL30319	56470	23914582	0.9459	0.9096	0.5187	423
QL30320	51765	21488981	0.9533	0.9209	0.529	415
QL30323	55966	23047962	0.952	0.9185	0.5226	411
QL30325	61833	25499033	0.9481	0.9145	0.5154	412
QL30330	59873	24808194	0.9536	0.9207	0.5136	414
QL30337	55510	22862557	0.9563	0.9251	0.5182	411
QL30343	57300	24201786	0.9461	0.9112	0.5117	422
QL30345	62062	25707586	0.9488	0.9145	0.5201	414
QL30346	53178	21776820	0.9554	0.9236	0.5256	409
QL30355	62110	25828596	0.9516	0.9182	0.5412	415
QL30358	56126	23379295	0.9468	0.9116	0.5138	416
QL30360	50098	21104321	0.9435	0.9065	0.5249	421
QL30365	62623	25638907	0.9564	0.9245	0.5509	409
QL30366	62831	25966218	0.9548	0.9234	0.5048	413
QL30367	53145	21657036	0.9594	0.9278	0.5353	407
QL30370	60528	25449109	0.9341	0.8916	0.5266	420
QL30375	47240	19410879	0.9559	0.9239	0.5212	410
QL30377	47082	19536392	0.945	0.9068	0.5248	414
QL30384	47096	19581737	0.9516	0.9188	0.5254	415
QL30391	38145	15808905	0.9513	0.9182	0.5124	414
QL30405	61682	25991087	0.9474	0.9123	0.5217	421
QL30413	47223	19498268	0.9504	0.9171	0.5074	412
QL30424	60452	25236322	0.9492	0.916	0.5083	417
QL30425	60185	24373711	0.9592	0.9274	0.5351	404
QL30428	62386	25988365	0.955	0.9228	0.5228	416
QL30435	42030	17819472	0.9322	0.8866	0.543	423
QL30448	44441	18560159	0.9462	0.9106	0.5161	417
QL30452	61152	25641456	0.9453	0.9087	0.5227	419
QL30453	55509	23325863	0.948	0.9134	0.5105	420
QL30456	43903	18403997	0.9494	0.9146	0.5288	419
QL30461	55216	22992304	0.9496	0.9152	0.5139	416
QL30466	58651	24082185	0.9554	0.9236	0.513	410
QL30475	58699	24109438	0.9542	0.9216	0.5181	410
QL30478	55214	23446039	0.9484	0.9134	0.5205	424
QL30480	40749	16798014	0.9517	0.9178	0.5268	412
QL30481	62403	26078793	0.9408	0.9039	0.5223	417
QL30483	48687	20405815	0.9457	0.9084	0.5332	419
QL30485	61447	25449678	0.952	0.9192	0.5234	414
QL30487	55377	23478576	0.9433	0.9068	0.5019	423
QL30516	30814	12798803	0.9476	0.9141	0.499	415
QL30623	56701	23741022	0.946	0.9107	0.513	418
QL30654	61503	25002942	0.9572	0.9263	0.5331	406
QL30668	55753	23506235	0.9416	0.9071	0.4824	421
QL30673	56561	23836565	0.9237	0.8784	0.4981	421
QL30674	56655	23762013	0.9443	0.9074	0.5344	419
QL30675	58095	23959997	0.949	0.9156	0.5085	412
QL30678	55802	23496800	0.944	0.9088	0.4906	421
QL30687	62201	26243383	0.9422	0.9074	0.4843	421
QL30695	64929	27228098	0.9477	0.9135	0.5029	419
QL30697	63017	26411762	0.9468	0.9115	0.5111	419
