# Supplementary material for: Enterotype Bacteroides Is Associated with a High Risk in Patients with Diabetes: A Pilot Study
Source: J Diabetes Res. 2020 Jan 22;2020:6047145. doi: 10.1155/2020/6047145 (PMC6996672; doi:10.1155/2020/6047145)
Supplement: Supplementary 7 — Table S7. Analysis of the α-diversity in the control and T2D groups. [file 6047145.f6.xls]

## Sheet: Sheet1
Table S6. Distribution of OTUs in 16 bacterial phyla in each sample（%）
tax_name	Firmicutes	Bacteroidetes	Proteobacteria	Actinobacteria	Verrucomicrobia	Fusobacteria	Synergistetes	Euryarchaeota	Cyanobacteria/Chloroplast	Candidatus Saccharibacteria	Tenericutes	Lentisphaerae	Spirochaetes	Acidobacteria	Latescibacteria	Other
QL30271	49.6159	8.51531	5.23029	7.39886	28.1459	0.00756916	0.00378458	0.00756916	0.961284	0.109753	0	0	0	0.00378458	0	0
QL30051	42.4459	0.325314	0.991073	56.1696	0.026479	0	0.0340445	0	0	0.00378272	0	0	0	0	0.00378272	0
QL30365	57.8921	7.44149	5.3094	24.9943	1.64357	0	2.38203	0.321897	0.00378702	0.00757404	0	0.00378702	0	0	0	0
QL30113	64.2571	22.11	10.5992	3.02239	0	0.00378272	0	0.00378272	0.00378272	0	0	0	0	0	0	0
QL30226	36.2636	43.9044	16.0911	3.04876	0.00378258	0	0.684647	0	0.00378258	0	0	0	0	0	0	0
QL30142	5.76465	59.4129	4.00575	0.151303	0.945644	29.7197	0	0	0	0	0	0	0	0	0	0
QL30042	46.5144	49.8998	2.66672	0.128608	0	0.786776	0.00378258	0	0	0	0	0	0	0	0	0
QL30221	30.4925	54.1496	10.4744	0.0794371	0	4.80406	0	0	0	0	0	0	0	0	0	0
QL30360	6.02186	32.5226	40.6211	15.2362	0.00378258	5.5793	0.00756515	0	0.00756515	0	0	0	0	0	0	0
QL30485	49.6922	33.2092	16.6844	0.387656	0.0152022	0	0	0	0	0.0114016	0	0	0	0	0	0
QL30461	42.7863	36.6383	18.5046	0.904789	1.15086	0.00757146	0.00378573	0	0	0.00378573	0	0	0	0	0	0
QL30480	71.9363	13.7059	10.2198	3.62258	0.00378931	0.0644183	0.00757863	0.397878	0	0.0341038	0	0.00757863	0	0	0	0
QL30697	35.4252	20.9828	20.0825	0.650628	0	21.5653	1.26721	0.026479	0	0	0	0	0	0	0	0
QL30233	51.9688	29.9353	13.761	3.71449	0.219389	0.400953	0	0	0	0	0	0	0	0	0	0
QL30377	65.5848	27.3755	2.48146	4.5317	0.0113482	0.0113482	0.00378272	0	0	0	0	0	0	0	0	0
QL30668	15.4443	77.2478	6.08617	0.491735	0	0.730037	0	0	0	0	0	0	0	0	0	0
QL30056	19.9493	0.83595	71.294	0.00756515	0	7.90937	0	0	0	0.00378258	0	0	0	0	0	0
QL30695	50.8909	43.397	5.6289	0.02648	0	0.056743	0	0	0	0	0	0	0	0	0	0
QL30673	29.3112	66.6868	3.68045	0.257215	0	0.0643038	0	0	0	0	0	0	0	0	0	0
QL30180	75.1106	20.32	2.93528	1.28229	0	0	0.347997	0.00378258	0	0	0	0	0	0	0	0
QL30448	59.9599	34.3168	3.80163	1.91406	0.00756544	0	0	0	0	0	0	0	0	0	0	0
QL30242	44.8072	35.2124	10.5861	9.29969	0	0.0454012	0.0416178	0	0	0.00756687	0	0	0	0	0	0
QL30069	23.2067	66.7108	2.36456	7.55524	0.00378329	0.00378329	0	0.00756659	0.0378329	0.109715	0	0	0	0	0	0
QL30093	84.4555	4.70838	4.20499	5.43129	0.980281	0	0	0.0151395	0.0302789	0.174104	0	0	0	0	0	0
QL30285	44.061	23.6474	3.74114	1.23543	26.4784	0.0116185	0.600287	0.205259	0	0	0	0.0193641	0	0	0	0
QL30191	55.9124	31.215	11.0342	1.55092	0.0113482	0.200484	0	0	0	0.0756544	0	0	0	0	0	0
QL30058	33.4796	8.0985	46.0567	9.55857	2.77263	0.0113477	0	0	0.0151303	0.00756515	0	0	0	0	0	0
QL30475	64.0264	24.8041	2.94196	7.95502	0	0.0037863	0.268827	0	0	0	0	0	0	0	0	0
QL30068	51.7116	0.181564	41.7256	5.65495	0	0.665734	0	0.00378258	0.0226955	0.0340432	0	0	0	0	0	0
QL30265	70.7939	8.31	20.3285	0.189208	0.00378415	0.363279	0	0	0.0113525	0	0	0	0	0	0	0
QL30358	45.6393	45.7906	8.33176	0.196754	0.00378372	0	0.0113512	0.0189186	0	0	0	0.00756744	0	0	0	0
QL30218	34.7354	47.3957	3.60101	14.196	0	0.071869	0	0	0	0	0	0	0	0	0	0
QL30315	64.0924	16.5757	6.39597	12.8261	0	0	0.102366	0	0.00379133	0.00379133	0	0	0	0	0	0
QL30345	49.2983	23.9947	24.1044	2.57235	0.00756573	0.00378286	0.00378286	0.00378286	0.00378286	0.00756573	0	0	0	0	0	0
QL30132	83.3656	6.16961	4.59875	4.50768	0.0569152	0.011383	0	0	0.664011	0.626067	0	0	0	0	0	0
QL30081	38.5384	1.98971	34.4568	24.9016	0	0.0832199	0	0	0.00378272	0.026479	0	0	0	0	0	0
QL30141	27.9003	29.5798	2.55702	39.9327	0	0.0151303	0	0	0.00378258	0.0113477	0	0	0	0	0	0
QL30435	52.9278	2.84461	27.1297	17.0639	0	0.0113482	0	0	0	0.0226963	0	0	0	0	0	0
QL30054	54.8839	43.1149	1.83854	0.162669	0	0	0	0	0	0	0	0	0	0	0	0
QL30009	53.3838	6.13141	19.6857	20.7044	0.00757432	0.0113615	0.0605946	0	0	0	0	0.0151486	0	0	0	0
QL30367	78.5405	7.16075	3.58607	10.0562	0.0834851	0	0	0.569217	0	0.00379478	0	0	0	0	0	0
QL30346	66.6969	18.8493	4.99697	9.42276	0	0.00756544	0.00378272	0	0.00378272	0.0189136	0	0	0	0	0	0
QL30302	84.3704	3.19628	10.2659	2.09555	0	0.0340432	0	0	0	0.0378258	0	0	0	0	0	0
QL30007	25.1239	69.38	5.0157	0.23452	0	0.245868	0	0	0	0	0	0	0	0	0	0
QL30405	41.7691	31.2777	24.8231	0.881541	0	0	1.24475	0	0	0	0	0.00378344	0	0	0	0
QL30104	43.925	36.5751	17.1244	2.36798	0	0	0.00378272	0	0	0.00378272	0	0	0	0	0	0
QL30424	44.2314	53.8886	1.60766	0.26479	0.00378272	0	0	0.00378272	0	0	0	0	0	0	0	0
QL30174	14.3284	82.2938	3.15467	0.181564	0	0.0378258	0.00378258	0	0	0	0	0	0	0	0	0
QL30261	54.1018	14.6177	11.7025	1.28587	18.1242	0.00381563	0.125916	0.0228938	0	0	0	0.0152625	0	0	0	0
QL30452	28.78	37.6735	33.2514	0.0794401	0.208057	0	0.00378286	0	0	0	0	0.00378286	0	0	0	0
QL30000	36.6962	59.7329	3.49902	0.0416099	0.00378272	0.0113482	0	0	0.0113482	0.00378272	0	0	0	0	0	0
QL30243	34.6921	59.2256	5.71894	0.158964	0.166534	0.0151395	0.00756974	0	0.00378487	0	0	0.0113546	0	0	0	0
QL30337	57.7899	20.2189	6.47959	14.1218	1.31788	0.0113611	0.0492312	0	0	0.00757404	0	0	0	0.00378702	0	0
QL30203	34.7116	59.0354	4.08928	0.487989	0	1.66824	0.00756573	0	0	0	0	0	0	0	0	0
QL30317	51.8629	38.2759	5.50743	3.88849	0	0.461474	0	0	0	0.00378258	0	0	0	0	0	0
QL30187	57.0687	0.962705	17.8517	3.53623	0	8.93723	4.09339	7.45528	0	0.00379018	0	0.0909642	0	0	0	0
QL30220	35.5184	49.408	4.61474	10.455	0	0	0	0.00378258	0	0	0	0	0	0	0	0
QL30323	56.3191	26.226	2.53141	14.8706	0.0302709	0.0151355	0	0	0.00378387	0.00378387	0	0	0	0	0	0
QL30185	22.7057	71.593	3.55231	0.87565	0.0038238	0.0114714	0	0	0	0.0038238	1.25421	0	0	0	0	0
QL30391	55.7745	40.1135	1.94439	2.10706	0.0605258	0	0	0	0	0	0	0	0	0	0	0
QL30674	52.1905	14.3841	17.7247	15.1067	0.00378329	0.556144	0	0.0264831	0.00756659	0	0	0	0	0	0	0
QL30018	28.9127	5.32672	64.25	0.473234	0.193079	0	0.806391	0	0	0.00378587	0	0.0340728	0	0	0	0
QL30487	32.9236	60.003	4.76983	0.00756515	0.00378258	2.27333	0	0.00378258	0	0.0151303	0	0	0	0	0	0
QL30355	56.8597	5.49609	32.1746	5.42043	0	0.00378258	0	0.00378258	0.026478	0.0151303	0	0	0	0	0	0
QL30006	30.9502	51.1764	11.0153	6.85051	0	0	0.00378272	0.00378272	0	0	0	0	0	0	0	0
QL30320	73.3941	6.47272	19.5998	0.412348	0.00756601	0.00378301	0.0756601	0.0340471	0	0	0	0	0	0	0	0
QL30253	26.5423	38.9038	34.5463	0	0	0	0	0	0	0.00756515	0	0	0	0	0	0
QL30325	60.0772	32.5087	6.37388	0.968376	0	0	0.068089	0	0	0	0	0.00378272	0	0	0	0
QL30453	21.7582	61.9988	6.30201	0.219398	0	9.71024	0.00378272	0	0	0.00756544	0	0	0	0	0	0
QL30171	11.8097	5.77243	82.1304	0.24966	0	0.00756544	0	0	0.0113482	0.0189136	0	0	0	0	0	0
QL30413	63.4299	33.5727	2.8529	0.144451	0	0	0	0	0	0	0	0	0	0	0	0
QL30092	23.7003	41.3909	16.6813	1.36725	16.6432	0.0114255	0.00380851	0	0.133298	0.0647446	0	0.00380851	0	0	0	0
QL30096	80.6234	3.696	0.707422	14.8597	0	0.0870092	0	0.022698	0	0.00378301	0	0	0	0	0	0
QL30152	62.3466	29.2336	2.83825	2.69007	2.88385	0	0.00379954	0	0	0	0	0.00379954	0	0	0	0
QL30206	58.7396	27.836	1.35795	12.0475	0.0113477	0.00378258	0	0	0	0.00378258	0	0	0	0	0	0
QL30678	20.5267	75.5231	1.907	2.03564	0.00756744	0	0	0	0	0	0	0	0	0	0	0
QL30257	5.48474	40.1975	3.77501	0.0945644	0.00378258	50.4445	0	0	0	0	0	0	0	0	0	0
QL30244	40.0651	8.51836	4.61853	45.4174	1.19529	0.177781	0	0.00378258	0	0.00378258	0	0	0	0	0	0
QL30202	24.6927	63.1388	5.27291	6.85403	0.0302606	0.0113477	0	0	0	0	0	0	0	0	0	0
QL30303	57.1245	33.5817	9.27488	0.0189129	0	0	0	0	0	0	0	0	0	0	0	0
QL30159	53.9442	31.516	10.9757	2.9019	0.514547	0.124853	0.00378344	0.00378344	0.0151337	0	0	0	0	0	0	0
QL30190	7.86806	26.8951	65.0061	0.170222	0.0189136	0.0416099	0	0	0	0	0	0	0	0	0	0
QL30230	54.1008	31.5351	4.36559	9.99092	0.00378301	0	0.00378301	0	0	0	0	0	0	0	0	0
QL30483	69.2846	12.8514	7.72519	6.8248	3.31026	0	0	0	0	0.00378315	0	0	0	0	0	0
QL30343	58.322	35.1717	6.18097	0.313966	0	0.00378272	0	0	0	0.00756544	0	0	0	0	0	0
QL30425	72.6174	2.67013	2.44171	15.5443	1.58318	0	3.62319	1.50441	0	0.0118147	0	0.00393825	0	0	0	0
QL30370	70.3673	14.4453	14.4301	0.68156	0	0.00378644	0.0492238	0	0.00378644	0.0113593	0	0.00757289	0	0	0	0
QL30127	42.9047	51.7672	0.639522	4.67721	0.00378415	0	0	0	0	0.0075683	0	0	0	0	0	0
QL30169	57.272	21.6931	13.5303	7.38737	0	0.0605212	0.026478	0.0189129	0	0.0113477	0	0	0	0	0	0
QL30270	53.9498	27.7542	11.0169	5.31553	1.92948	0.0340496	0	0	0	0	0	0	0	0	0	0
QL30375	68.5982	10.4711	8.82038	9.9234	1.99157	0	0.0114899	0.168518	0	0.00382995	0	0.0114899	0	0	0	0
QL30481	28.3606	64.9296	5.31714	1.05964	0.0454133	0.0340599	0	0.230851	0	0.0227066	0	0	0	0	0	0
QL30456	48.3748	48.7267	2.06607	0.344345	0.00756802	0.00378401	0	0.469217	0	0.00756802	0	0	0	0	0	0
QL30516	41.2446	51.8404	6.50274	0.404766	0	0.00378286	0	0	0	0.00378286	0	0	0	0	0	0
QL30267	24.9669	40.7136	33.9753	0.298891	0.0378344	0.00756687	0	0	0	0	0	0	0	0	0	0
QL30654	74.8931	5.29223	4.7248	15.0482	0.00756573	0.00378286	0	0.0113486	0	0.0189143	0	0	0	0	0	0
QL30060	76.0393	19.7579	2.44404	1.73595	0	0	0.0190346	0	0	0.00380691	0	0	0	0	0	0
QL30623	35.1813	40.4488	17.3238	7.03852	0.00378415	0.00378415	0	0	0	0	0	0	0	0	0	0
QL30151	49.565	4.49043	26.6437	18.8772	0.117273	0.124839	0.0567451	0.018915	0.018915	0.0794431	0	0	0	0	0.00756601	0
QL30255	69.1077	28.7816	0.556039	1.54329	0	0.0113477	0	0	0	0	0	0	0	0	0	0
QL30181	58.7389	15.1313	25.3122	0.590417	0.00756945	0.00378472	0	0	0	0	0	0.215729	0	0	0	0
QL30288	13.1898	61.4896	25.2865	0.0302606	0	0.00378258	0	0	0	0	0	0	0	0	0	0
QL30153	69.4676	18.2861	8.41033	2.95365	0	0	0.00378673	0.00757346	0.700545	0.170403	0	0	0	0	0	0
QL30024	35.4808	55.8826	3.34039	5.27729	0	0.00756601	0.011349	0	0	0	0	0	0	0	0	0
QL30260	48.7871	40.6471	6.2176	1.91864	2.39924	0	0.0189215	0	0	0	0	0.00756859	0	0.0037843	0	0
QL30687	10.2394	83.8522	5.75708	0.11726	0	0.0302606	0	0	0	0.00378258	0	0	0	0	0	0
QL30196	22.1857	76.0213	1.67196	0.109699	0	0.00756544	0	0	0	0.00378272	0	0	0	0	0	0
QL30189	40.8948	22.521	5.55239	28.9089	0.27724	0.0227868	0.00759561	1.09757	0.62284	0.0949451	0	0	0	0	0	0
QL30366	53.4062	31.0852	15.24	0.253433	0.00378258	0	0.00378258	0.00378258	0	0.00378258	0	0	0	0	0	0
QL30264	61.5321	3.80934	32.457	1.26348	0.919236	0.0113486	0.00756573	0	0	0	0	0	0	0	0	0
QL30214	30.7908	61.6989	6.29519	0.0757088	1.11292	0.0151418	0	0	0	0.0113563	0	0	0	0	0	0
QL30250	59.3849	27.4852	12.5019	0.366924	0.139961	0.0491754	0.0567408	0	0	0.0151309	0	0	0	0	0	0
QL30268	36.7985	54.7982	2.69636	5.64644	0.0265091	0.0302961	0	0	0.00378702	0	0	0	0	0	0	0
QL30194	19.6248	68.698	6.22258	1.07808	4.37282	0.00378272	0	0	0	0	0	0	0	0	0	0
QL30149	68.4956	17.9598	3.74872	5.03995	4.75217	0	0.00378659	0	0	0	0	0	0	0	0	0
QL30215	80.2436	12.3955	2.51163	4.65635	0.0113477	0.177781	0	0	0	0	0	0	0	0.00378258	0	0
QL30161	46.8398	43.6152	8.1031	1.4382	0.00378472	0	0	0	0	0	0	0	0	0	0	0
QL30115	59.3351	23.6833	16.7014	0.170384	0.0795123	0.0037863	0.0075726	0	0.0075726	0.0113589	0	0	0	0	0	0
QL30112	35.352	43.6056	19.7677	1.26338	0.00378258	0	0	0	0	0.00756515	0	0	0	0	0	0
QL30019	25.0861	9.37701	64.3643	1.16125	0	0	0	0	0	0.0113477	0	0	0	0	0	0
QL30478	67.5568	29.663	2.50028	0.276128	0	0	0	0	0	0.00378258	0	0	0	0	0	0
QL30330	61.7165	31.6942	5.34856	1.21421	0	0.0113477	0	0.00756515	0	0.00756515	0	0	0	0	0	0
QL30319	18.1244	52.0693	29.6209	0.117273	0	0.00756601	0.0567451	0	0	0.00378301	0	0	0	0	0	0
QL30225	50.4898	47.165	2.30359	0.026478	0.0151303	0	0	0	0	0	0	0	0	0	0	0
QL30080	24.4004	69.1798	5.36809	0.783082	0.208065	0	0	0.011349	0	0.0491791	0	0	0	0	0	0
QL30384	68.1242	24.5262	1.95181	0.457692	0.181564	4.72822	0.0302606	0	0	0	0	0	0	0	0	0
QL30078	30.9194	60.4351	7.78282	0.862656	0	0	0	0	0	0	0	0	0	0	0	0
QL30167	33.0332	2.23929	10.8749	0.385823	53.1868	0.279911	0	0	0	0	0	0	0	0	0	0
QL30296	32.3194	63.6212	3.05679	0.991185	0.0075663	0	0.00378315	0	0	0	0	0	0	0	0	0
QL30091	57.3613	6.91469	17.1637	16.5014	0.00756945	0.984028	0	0.0113542	0.158958	0.89698	0	0	0	0	0	0
QL30428	37.614	37.0655	2.36789	22.9489	0	0	0	0	0	0.00378258	0	0	0	0	0	0
QL30675	60.003	35.8513	1.54707	2.31872	0.257215	0	0	0	0.0189129	0.00378258	0	0	0	0	0	0
QL30466	62.4525	25.5128	6.68212	3.24419	2.06276	0	0.00379881	0	0	0	0	0.041787	0	0	0	0
QL30263	55.8632	37.6229	2.61386	3.73355	0.00378272	0.0189136	0.132395	0.00378272	0	0.00378272	0	0.00378272	0	0	0	0
J30219	62.0835	29.1313	8.23235	0.488488	0.0151469	0	0	0	0	0.0492275	0	0	0	0	0	0
J30507	45.7689	48.4017	4.77776	1.04785	0	0	0.00378286	0	0	0	0	0	0	0	0	0
J30510	33.1832	61.6162	5.13626	0.0340651	0.00757002	0	0.011355	0	0	0	0.00378501	0.00757002	0	0	0	0
J30514	26.5406	48.5001	24.9177	0.0340458	0.00378286	0	0	0.00378286	0	0	0	0	0	0	0	0
J30515	68.5781	27.4729	2.74615	0.461474	0.0113477	0.726255	0	0	0	0.00378258	0	0	0	0	0	0
J30523	46.7444	52.2562	0.847971	0.0643549	0.0681405	0.00757117	0	0	0	0.0113568	0	0	0	0	0	0
J30525	40.7232	57.5217	1.3239	0.404736	0.0226955	0	0	0	0	0	0	0.00378258	0	0	0	0
J30526	47.1574	50.6033	1.72107	0.487952	0.0113477	0.00378258	0.00378258	0	0	0.0113477	0	0	0	0	0	0
J30529	77.3831	16.3565	3.8092	2.24694	0.204267	0	0	0	0	0	0	0	0	0	0	0
J30534	44.2297	48.331	5.41146	0.854441	1.02533	0.00379752	0.0303801	0.0379752	0	0	0	0.0759503	0	0	0	0
J30535	54.0819	28.1002	17.3678	0.11349	0	0.00378301	0	0	0	0.0378301	0	0	0.295075	0	0	0
J30541	65.4258	26.5161	5.03537	1.88779	1.09711	0.026482	0.0113494	0	0	0	0	0	0	0	0	0
J30547	53.5583	38.7235	7.07124	0.609133	0	0.0340509	0	0	0	0	0.00378344	0	0	0	0	0
J30551	44.9446	51.7948	2.22037	1.03643	0	0	0	0	0.00378258	0	0	0	0	0	0	0
J30552	69.9268	25.0237	0.481444	4.14345	0.413207	0	0	0	0.00379089	0.00758179	0	0	0	0	0	0
J30561	33.6436	62.6329	3.40561	0.314073	0	0	0	0	0.00378401	0	0	0	0	0	0	0
J30562	47.2423	50.952	1.54067	0.261195	0	0	0	0	0.00378544	0	0	0	0	0	0	0
J30565	41.9374	45.6217	4.03223	0.95321	7.38737	0.0605212	0.00756515	0	0	0	0	0	0	0	0	0
J30566	52.576	46.0924	1.15373	0.143743	0.00378272	0.026479	0	0	0	0.00378272	0	0	0	0	0	0
J30572	40.7301	47.7738	10.679	0.684698	0	0.128617	0	0	0	0.00378286	0	0	0	0	0	0
J30573	49.7049	31.2188	13.9469	1.72114	3.36284	0.0416099	0	0	0	0.00378272	0	0	0	0	0	0
J30576	54.7043	33.2009	7.2523	0.366966	4.40359	0.0226989	0.0226989	0	0.026482	0	0	0	0	0	0	0
J30578	70.3295	25.2246	1.8476	2.03042	0.36952	0.0272278	0.0583453	0.105022	0	0.00388969	0	0.00388969	0	0	0	0
J30584	56.7047	30.8081	9.06745	0.368163	3.0326	0.015182	0	0	0.0037955	0	0	0	0	0	0	0
J30585	32.6512	43.0873	5.4053	0.605212	0	18.2396	0	0	0.00756515	0.00378258	0	0	0	0	0	0
J30589	53.3381	44.2675	1.98207	0.408518	0.00378258	0	0	0	0	0	0	0	0	0	0	0
J30592	9.32098	71.7193	18.8841	0.0378286	0.00378286	0.00378286	0	0	0.0302629	0	0	0	0	0	0	0
J30595	52.0807	28.5693	15.2606	4.0743	0.00756601	0.00378301	0	0	0	0.00378301	0	0	0	0	0	0
J30596	58.0148	23.4315	17.6796	0.317869	0.533565	0	0.0189208	0	0.00378415	0	0	0	0	0	0	0
J30619	49.5664	43.6054	2.23064	1.73452	2.85173	0	0	0	0	0.00378716	0	0.00757432	0	0	0	0
J30620	20.3919	79.018	0.487952	0.098347	0	0.00378258	0	0	0	0	0	0	0	0	0	0
J30626	45.156	46.8735	4.35408	1.93683	1.67581	0	0	0	0	0.00378286	0	0	0	0	0	0
J30632	42.0887	57.219	0.465257	0.219389	0	0	0	0	0	0.00756515	0	0	0	0	0	0
J30649	40.8802	55.7935	2.83811	0.469235	0	0	0.0075683	0.0075683	0	0.00378415	0	0	0	0	0	0
J30650	48.3603	33.2829	4.94383	11.6087	0	1.79294	0	0	0	0.0113477	0	0	0	0	0	0
J30683	50.6374	41.1015	6.38121	1.87616	0.00378258	0	0	0	0	0	0	0	0	0	0	0
J30699	50.191	46.7448	2.35294	0.124834	0.0302629	0.529601	0.02648	0	0	0	0	0	0	0	0	0
