# Supplementary material for: Enterotype Bacteroides Is Associated with a High Risk in Patients with Diabetes: A Pilot Study
Source: J Diabetes Res. 2020 Jan 22;2020:6047145. doi: 10.1155/2020/6047145 (PMC6996672; doi:10.1155/2020/6047145)
Supplement: Supplementary 12 — Table S12. Correlation analysis of differential genus and glucose metabolic indices. [file 6047145.f12.xls]

## Sheet: Sheet1
Table S12. Correlation analysis of differential genus and glucose metabolic indices.
genus	HbA1c		FPG		2hPG		HOMA2-β		HOMA2-IR		Gutt-ISI
	r	P	r	P	r	P	r	P	r	P	r	P
g__Prevotella	-0.187	0.036	-0.284	0.001	-0.252	0.005	0.072	0.423	-0.289	0.001	0.296	0.001
g__Dialister	-0.02	0.827	-0.095	0.294	0.035	0.697	0.009	0.923	-0.163	0.069	0.099	0.272
g__Sutterella	-0.051	0.576	-0.137	0.128	-0.147	0.103	0.094	0.295	-0.111	0.22	0.168	0.061
g__Flavonifractor	-0.012	0.897	-0.055	0.546	0.145	0.106	-0.036	0.694	-0.141	0.116	0.01	0.912
g__Eggerthella	0.163	0.07	0.189	0.034	0.291	0.001	-0.209	0.019	-0.019	0.831	-0.363	<0.001
g__Clostridium IV	-0.062	0.493	-0.074	0.414	-0.021	0.816	-0.009	0.921	-0.151	0.093	-0.024	0.79
g__Enterococcus	0.237	0.008	0.109	0.226	0.236	0.008	-0.152	0.092	-0.035	0.696	-0.231	0.01
g__Fusicatenibacter	-0.021	0.819	0.072	0.425	-0.013	0.888	0.116	0.199	0.215	0.016	-0.026	0.775
g__Clostridium XVIII	-0.12	0.183	-0.076	0.397	-0.092	0.306	0.202	0.024	0.113	0.208	0.065	0.47
g__Anaerostipes	0.12	0.182	0.112	0.214	0.089	0.324	0.014	0.88	0.126	0.163	-0.076	0.398
g__Blautia	0.043	0.634	0.031	0.734	0.028	0.755	0.042	0.64	0.116	0.199	-0.07	0.438
g__Clostridium XI	-0.095	0.294	-0.081	0.371	-0.097	0.284	0.106	0.238	-0.024	0.789	0.056	0.534
g__Porphyromonas	-0.013	0.882	0.053	0.558	0.033	0.713	-0.149	0.097	-0.047	0.605	-0.135	0.135
g__Granulicatella	0.254	0.004	0.107	0.234	0.151	0.092	-0.092	0.306	-0.015	0.867	-0.218	0.015
g__Staphylococcus	-0.041	0.652	-0.035	0.698	-0.025	0.783	0.064	0.481	0.012	0.898	-0.037	0.679
g__Parabacteroides	0.04	0.654	0.011	0.907	0.099	0.27	0.03	0.741	0.066	0.467	-0.038	0.677
g__Clostridium XlVa	-0.071	0.431	-0.041	0.65	-0.137	0.127	0.125	0.166	0.057	0.53	0.08	0.375
g__Bifidobacterium	0.077	0.396	0.172	0.055	0.242	0.007	-0.038	0.672	0.207	0.02	-0.299	0.001
g__Bacteroides	-0.034	0.709	0.031	0.732	0.049	0.585	0.104	0.25	0.178	0.048	0.063	0.488
