# Supplementary material for: Enterotype Bacteroides Is Associated with a High Risk in Patients with Diabetes: A Pilot Study
Source: J Diabetes Res. 2020 Jan 22;2020:6047145. doi: 10.1155/2020/6047145 (PMC6996672; doi:10.1155/2020/6047145)
Supplement: Supplementary 14 — Table S14. Correlation analysis of DAO, LPS, TNF-α, age, and fecal microbiome. [file 6047145.f14.xlsx]

## Sheet: Sheet1
Table S14. Correlation analysis of DAO, LPS, TNF-α, age and fecal microbiome.
genus	age		DAO		LPS		TNF-α
	r	P	r	P	r	P	r	P
g__Prevotella	-0.036	0.69	-0.145	0.128	-0.24	0.011	-0.319	0.001
g__Dialister	0.038	0.67	-0.146	0.125	-0.005	0.955	-0.053	0.58
g__Sutterella	-0.234	0.009	-0.064	0.5	-0.037	0.696	0.025	0.793
g__Flavonifractor	0.139	0.121	0.241	0.01	0.175	0.066	0.214	0.024
g__Eggerthella	0.256	0.004	0.309	0.001	0.223	0.018	0.051	0.591
g__Clostridium IV	0.148	0.1	0.071	0.457	-0.162	0.087	-0.061	0.523
g__Enterococcus	0.11	0.224	-0.055	0.566	0.123	0.197	0.117	0.22
g__Fusicatenibacter	0.024	0.789	-0.011	0.909	-0.033	0.726	0.012	0.897
g__Clostridium XVIII	0	0.996	-0.078	0.411	-0.029	0.763	0.132	0.165
g__Anaerostipes	-0.128	0.155	-0.01	0.916	0.116	0.223	0.069	0.468
g__Blautia	0.084	0.354	0.222	0.018	0.034	0.723	0.084	0.381
g__Clostridium XI	-0.008	0.934	-0.052	0.588	-0.068	0.479	0.125	0.189
g__Porphyromonas	0.162	0.07	-0.023	0.812	-0.035	0.716	-0.013	0.892
g__Granulicatella	0.088	0.326	-0.042	0.66	0.187	0.049	0.102	0.286
g__Staphylococcus	0.088	0.329	-0.018	0.852	-0.087	0.36	0.04	0.674
g__Parabacteroides	0.082	0.365	0.067	0.482	0.008	0.93	0.152	0.11
g__Clostridium XlVa	-0.077	0.392	0.028	0.768	-0.025	0.794	-0.076	0.428
g__Bifidobacterium	0.392	0	0.15	0.114	0.246	0.009	0.093	0.329
g__Bacteroides	-0.085	0.347	0.003	0.977	-0.02	0.837	0.168	0.077
